# Supplementary material
Source: HighWire-hosted journal article supplement (https://gut.bmj.com/content/67/9/1595)
Supplement: inline-supplementary-material-1 [file inline-supplementary-material-1.pdf]

# Negative control

# Lrig1

Corpus

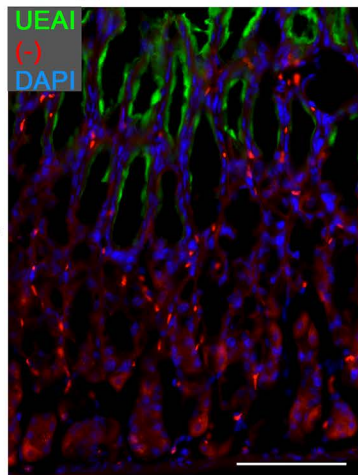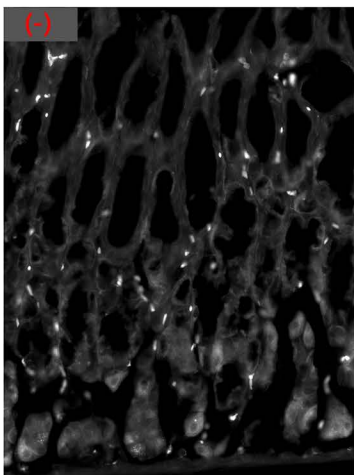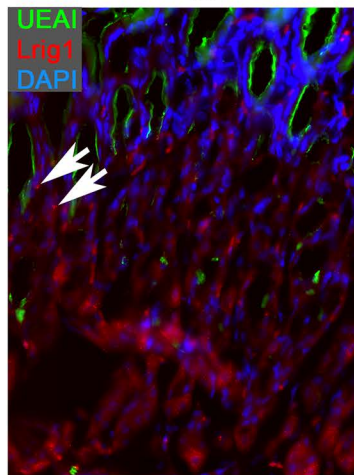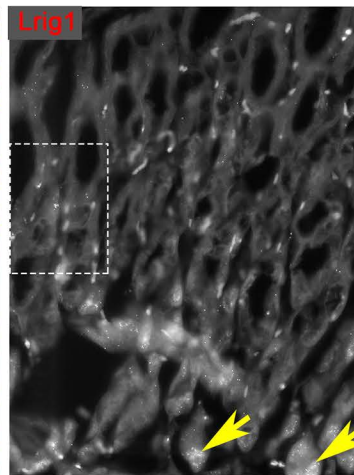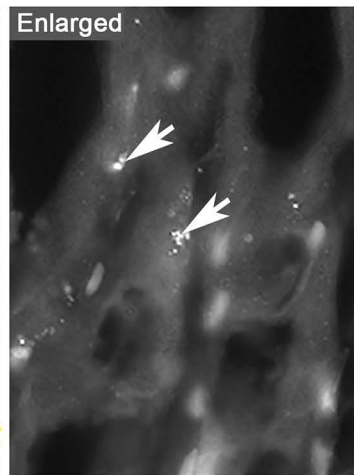

Antrum

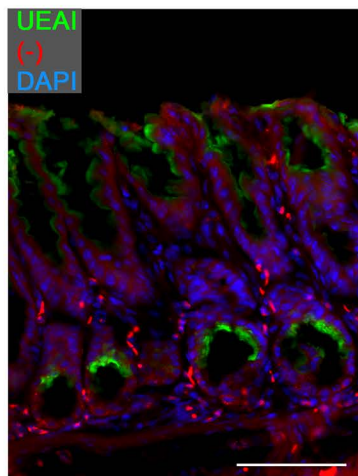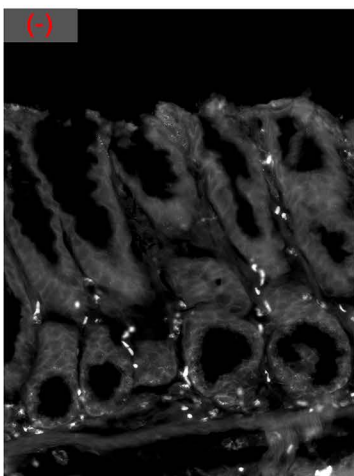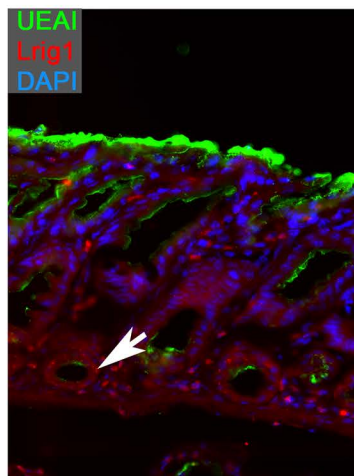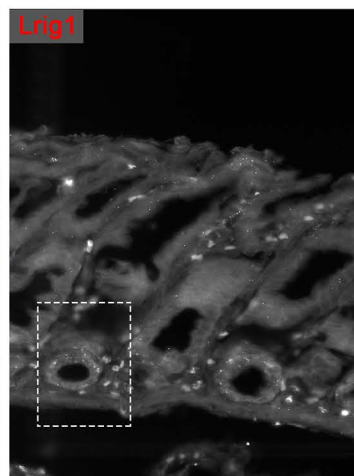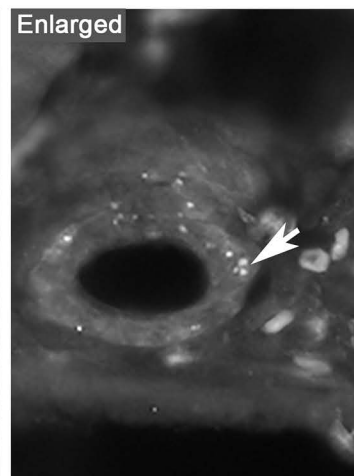

Wild type

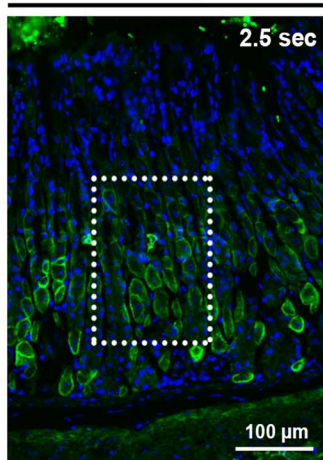

Lrig1 KO

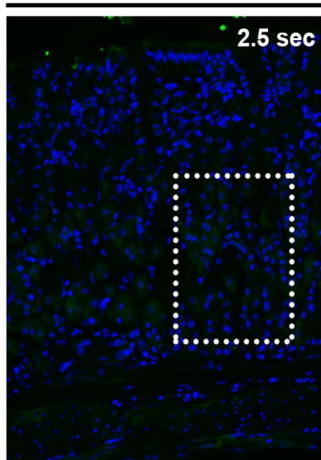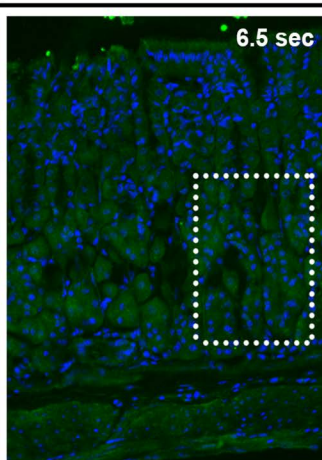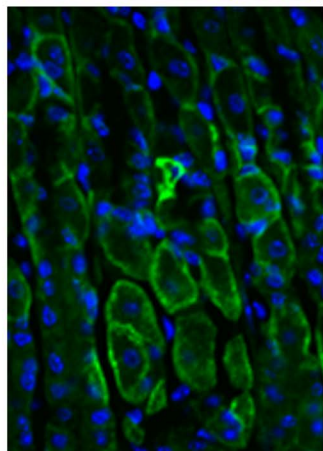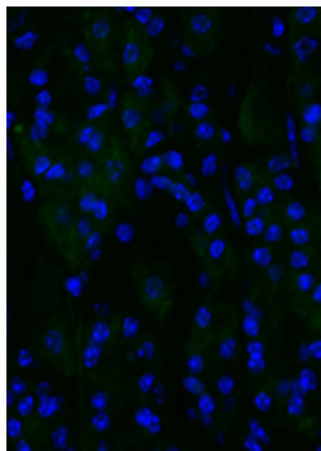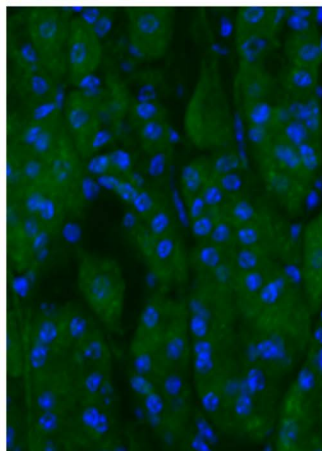

**Supplemental Table 1.****List of primary antibodies**

| <b>MARKER</b>                            | <b>SPECIES</b> | <b>SOURCE</b>                                       | <b>DILUTION</b> |
|------------------------------------------|----------------|-----------------------------------------------------|-----------------|
| GFP                                      | Rabbit         | Life Technologies, A11122                           | 1:500           |
| GFP                                      | Rabbit         | Novus, NB600-308                                    | 1:1,000         |
| Ki-67                                    | Rat            | DAKO, M7249                                         | 1:300           |
| Ki-67-PE                                 | Rat            | eBioscience, 12-5698-82                             | 1:200           |
| H/K-ATPase                               | Mouse          | Fitzgerald, 10R-H100B                               | 1:1,000         |
| GS-II Lectin, Alexa Fluor® 647 Conjugate |                | Molecular probes, L32451                            | 1:2,500         |
| CD44v9                                   | Rat            | Cosmo Bio, LKGM002                                  | 1:15,000        |
| Intrinsic factor                         | Goat           | gift David Alpers, Washington University, St. Louis | 1:2,000         |
| Ghrelin                                  | Rabbit         | Phoenix Pharmaceuticals, H-031-31                   | 1:200           |
| Lrig1                                    | Goat           | R&D systems, AF3688                                 | 1:500           |
| Beta-Gal                                 | Rabbit         | AbD Serotec, AHP1292GA                              | 1:1,000         |
| Dclk1                                    | Rabbit         | Abcam, ab109029                                     | 1:1,500         |
| UEAI, FITC conjugated                    |                | Sigma, L9006                                        | 1:2,000         |
